# Supplementary material for: Enhanced remediation of paddy soils contaminated with butachlor through the application of nitrogen-fixing cyanobacteria as a nitrogen fertilizer substitute
Source: Research Square preprint supplement (doi:10.21203/rs.3.rs-6625888/v1), 2025-05-22
Supplement: Supplementary file 1 [file 80a57def983f3bd56f0160d2.docx]

**Enhanced remediation of paddy soils contaminated with butachlor through the application of nitrogen-fixing cyanobacteria as a nitrogen fertilizer substitute**

Huiyao Liu a, b, Yu Zhu a, c, Xiao Liang a, e, Kan Wang f, Hongjie Qin g, Genbao Li a, Chengrong Peng d, *, Dunhai Li a, c*

a *Key Laboratory of Algal Biology, Institute of Hydrobiology, Chinese Academy of Sciences, Wuhan 430072, China*

b *School of Environmental Studies, China University of Geosciences, Wuhan 430074, China*

c *University of Chinese Academy of Sciences, Beijing 100049, China*

d *Yangtze Eco-Environment Engineering Research Center, China Three Gorges Corporation, Beijing 100038, PR China*

e *College of Environmental Science and Engineering, Nankai University, Tianjin 300350, China*

f *Central-Southern Safety & Environment Technology Institute Co., Ltd., Wuhan 430051, China*

g *Guangdong Key Laboratory of Ornamental Plant Germplasm Innovation and Utilization, Environmental Horticulture Research Institute, Guangdong Academy of Agricultural Sciences, Guangzhou 510640, China*

**1 Text**

**3 Tables**

**2 Figures**

*****Corresponding author, E-mail addresses: [lidh@ihb.ac.cn](mailto:lidh@ihb.ac.cn) (Dunhai Li); [pengcr@ihb.ac.cn](mailto:pengcr@ihb.ac.cn) (Chengrong Peng)

**Text S1**

Metagenomic data processing and annotation.

Total genomic DNA was extracted from paddy soil samples collected at the harvesting stage via the E.Z.N.A.® Soil DNA Kit (Omega Biotek, Norcross, GA, U.S.). The purity of the DNA extracted from the soil samples was tested via a NanoDrop 2000 (Thermo Fisher Scientific, USA). The concentration of DNA extracted from the soil samples was detected via Qubit 4.0 (Thermo Fisher Scientific, USA), and the integrity of the extracted genomic DNA was detected via 1% agarose gel electrophoresis. DNA extracts were fragmented to an average size of approximately 350 bp via Covaris M220 (Gene Company Limited, China), and paired-end libraries were constructed via NEXTFLEX Rapid DNA-Seq (Bioo Scientific, Austin, TX, USA). Paired-end sequencing was performed on the Illumina NovaSeq (Illumina, Inc., San Diego, CA, USA) platform at MajorbioBio-Pharm Technology Co., Ltd. (Shanghai, China). The quality control phase was performed via Fastp (https://github.com/OpenGene/fastp, version 0.20.0) to remove low-quality reads that were <50 bp in length, had a mass value of <20, or contained N bases. Macrogenomics data were spliced via MEGAHIT (https://github.com/voutcn/MEGAHIT, version 1.1.2). Open reading frames (ORFs) from overlapping clusters of each assembly were predicted via MetaGene (http://metagene.cb.k.u-tokyo.ac.jp/). A catalog of nonredundant genes was then constructed via CD-HIT (http://www.bioinformatics.org/cd-hit/, version 4.6.1) and SOAPaligner (http://soap.genomics.org.cn/, version 2.21) to compare high-quality reads with nonredundant gene sets for comparison (95% identity). Representative sequences from the redundant genomes were compared to the NR database via Diamond (http://www.diamondsearch.org/index.php, version 0.8.35) to complete the taxonomic annotation (Janaki et al., 2015).

**Table S1**

Initial physical and chemical properties and enzymatic activities of the soil used in the pot experiments.

| pH | TN  (g·kg-1) | TP  (mg·kg-1) | TOC  (g·kg-1) | NH4+-N  (mg·kg-1) | NO3--N  (mg·kg-1) | S-ACP  (nmol·g-1d-1) | S-CAT  (mmol·g-1d-1) | S-SC  (mg·g-1d-1) | S-UE  (μg·g-1d-1) |
| --- | --- | --- | --- | --- | --- | --- | --- | --- | --- |
| 4.895 ± 0.06 | 0.953 ± 0.13 | 96.282 ± 3.14 | 11.700 ± 0.60 | 7.300 ± 0.87 | 4.233 ± 0.49 | 5551.968 ± 166.35 | 5.279±0.42 | 5.933 ± 0.10 | 948.148 ± 50.31 |

Abbreviations: TN: soil total nitrogen; TP: soil total phosphorus; TOC: soil total organic carbon; NH4+-N: soil ammonia nitrogen; NO3--N: soil nitrate nitrogen; S-ACP: soil acid phosphatase activity; S-CAT: soil catalase activity; S-SC: soil sucrose activity; S-UE: soil urease activity.

**Table S2**

PERMANOVA analysis of differences in β-diversity between treatments.

|  | Permutations | F Model | R2 | P values |
| --- | --- | --- | --- | --- |
| Among all | 999 | 6.594 | 0.739 | 0.001 |
| N VS NB | 999 | 3.473 | 0.258 | 0.008 |
| N VS NCB | 999 | 13.660 | 0.577 | 0.008 |
| NB VS NCB | 999 | 12.432 | 0.437 | 0.001 |

**Table S3**

Correlation coefficients and significance test values of the ranking results of each environmental factor according to RDA analysis.

| Environmental factor | RDA1 | RDA2 | r2 | P values |
| --- | --- | --- | --- | --- |
| pH | 0.620 | 0.784 | 0.513 | 0.003 |
| TOC | 0.754 | 0.657 | 0.148 | 0.291 |
| TP | 0.671 | 0.741 | 0.324 | 0.057 |
| TN | 0.955 | 0.296 | 0.140 | 0.335 |
| NO3--N | -0.237 | 0.971 | 0.118 | 0.374 |
| NH4+-N | 0.968 | 0.250 | 0.465 | 0.009 |
| S-ACP | 0.520 | 0.854 | 0.187 | 0.196 |
| S-UE | 0.600 | 0.800 | 0.387 | 0.021 |
| S-SC | 0.676 | 0.737 | 0.460 | 0.005 |
| S-CAT | -0.80 | -0.587 | 0.531 | 0.003 |
| Butachlor | -0.589 | -0.808 | 0.324 | 0.078 |
| NFC | 0.935 | 0.355 | 0.896 | 0.002 |

**
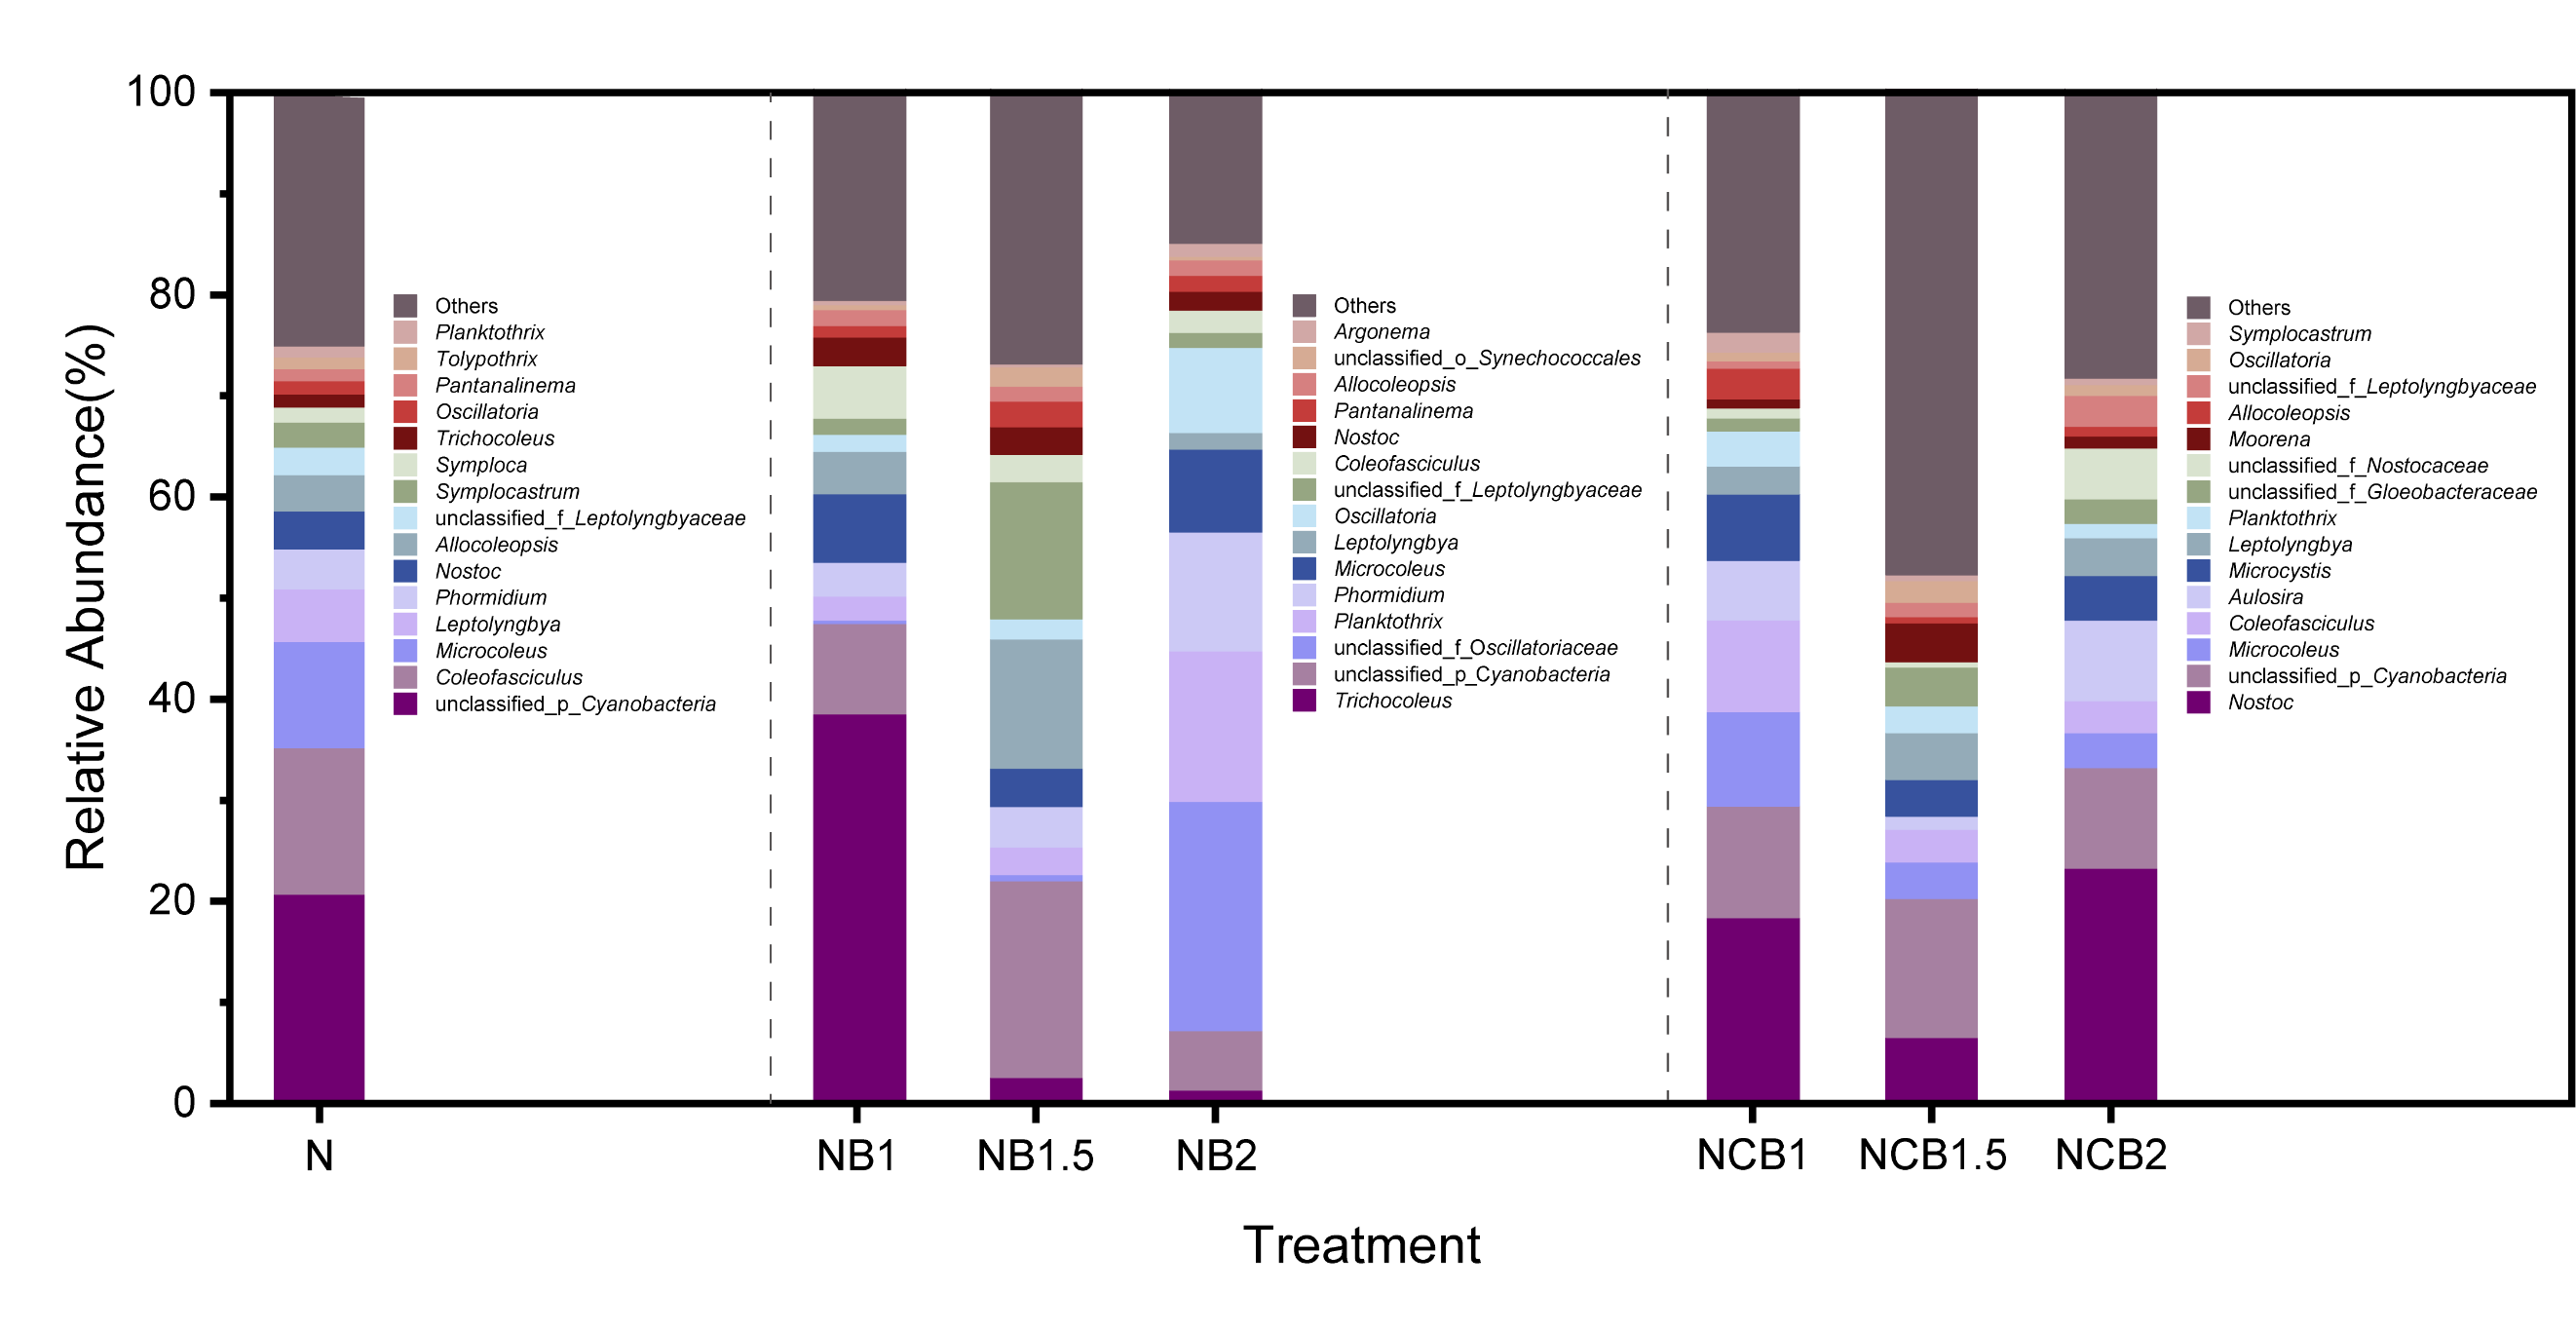
**

**Figure S1** Composition of cyanobacteria in different treatments at the genus level.


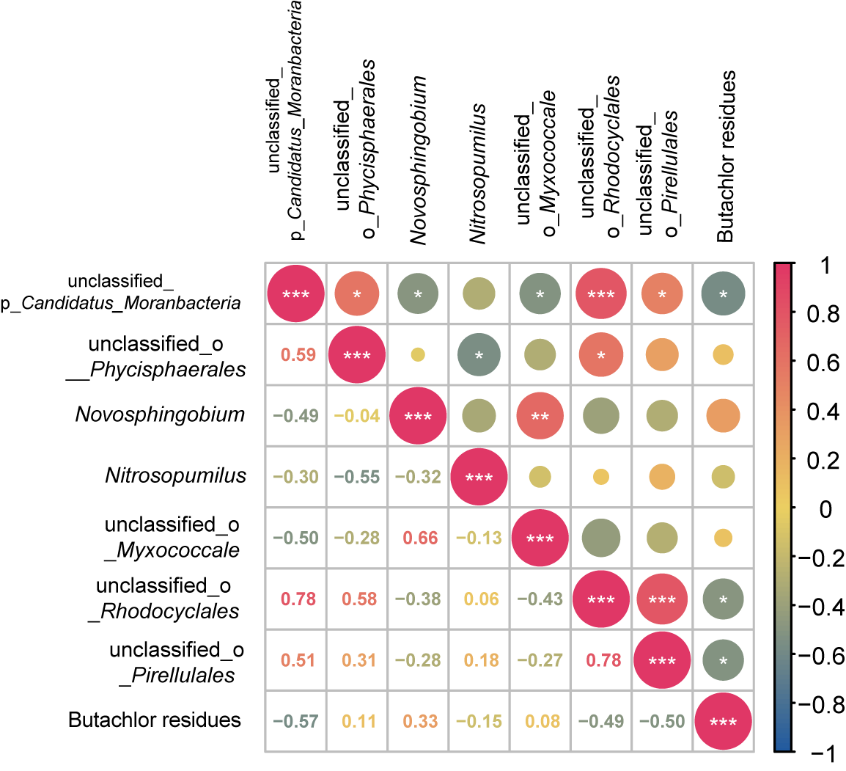


**Figure S2** Pearson correlation analysis between key nodes identified in co-occurrence networks and butachlor residues in the groups NB and NCB.

## References

Janaki, P., Sharma, N., Chinnusamy, C., Sakthivel, N., Nithya, C. (2015). Herbicide residues and their management strategies. *Indian Journal of Weed Science, 47(3)*, 329-344.
